# Supplementary material
Source: PubMed Central journal article supplement (PMC4137986)
Supplement: tx5001865_si_001.pdf [file tx5001865_si_001.pdf]

# Supporting Information

## Ethynylflavones, Highly Potent and Selective Inhibitors of Cytochrome P450 1A1

Navneet Goyal,<sup>†</sup> Jiawang Liu,<sup>†</sup> La'Nese Lovings,<sup>†</sup> Patrick Dupart,<sup>†</sup> Shannon Taylor,<sup>†</sup> Sydni Bellow,<sup>†</sup> Lydia Mensah,<sup>†</sup> Erika McClain,<sup>†</sup> Brandan Dotson,<sup>†</sup> Jayalakshmi Sridhar,<sup>†</sup> Xiaoyi Zhang,<sup>‡</sup> Ming Zhao,<sup>‡</sup> Maryam Foroozesh<sup>†,\*</sup>

<sup>†</sup> *Department of Chemistry, Xavier University of Louisiana, New Orleans, Louisiana 70125, United States*

<sup>‡</sup> *College of Pharmaceutical Sciences, Capital Medical University, Beijing 100069, PR China*

### Contents

|                                                                                                  |         |
|--------------------------------------------------------------------------------------------------|---------|
| Table S1. The $K_i$ values of ethynylflavone for inhibition of P450s 1A1, 1A2, 1B1, 2A6, and 2B1 | S2      |
| <sup>1</sup> H NMR and <sup>13</sup> C NMR Spectra of Ethynylflavones                            |         |
| 2'EF                                                                                             | S3-S4   |
| 3'EF                                                                                             | S5-S6   |
| 4'EF                                                                                             | S7-S8   |
| 5EF                                                                                              | S9-S10  |
| 6EF                                                                                              | S11-S12 |
| 7EF                                                                                              | S13-S14 |
| Elemental Analysis Data of Ethynylflavones                                                       | S15-S20 |

**Table S1.** The  $K_i$  values of tested compounds for inhibition of P450s 1A1, 1A2, 1B1, 2A6, and 2B1

|       | IC <sub>50</sub> (μM) |             |             |          |           |
|-------|-----------------------|-------------|-------------|----------|-----------|
|       | P450 1A1              | P450 1A2    | P450 1B1    | P450 2A6 | P450 2B1  |
| αNF   | 0.043±0.009           | 0.019±0.006 | 0.015±0.005 | >25      | 13.0±2.6  |
| 7E3PC | 0.74±0.08             | 2.97±0.33   | 1.72±0.23   | >25      | >25       |
| 2'EF  | 1.64±0.30             | 0.23±0.01   | 0.61±0.06   | >25      | 15.7±8.23 |
| 3'EF  | 0.041±0.004           | 0.80±0.12   | 0.16±0.03   | >25      | >25       |
| 4'EF  | 0.039±0.003           | 3.26±0.63   | 0.13±0.01   | >25      | >25       |
| 5EF   | 1.23±0.25             | 0.81±0.06   | 0.21±0.03   | >25      | >25       |
| 6EF   | 0.035±0.011           | 6.20±0.61   | 0.54±0.05   | >25      | >25       |
| 7EF   | 0.024±0.0002          | 0.52±0.06   | 0.42±0.06   | >25      | >25       |

The  $K_i$  values are represented as the mean ± SE μM of three independent experiments. αNF, alpha-naphthoflavone. 7E3PC, 7-ethynyl-3-phenylcoumarin.

2'-Ethynyl flavone

Current Data Parameters  
 NAME 2'-Ethynylflavone  
 EXPNO 1  
 PROCNO 1

F2 - Acquisition Parameters  
 Date\_ 20140502  
 Time 12.11  
 INSTRUM FOURIER300  
 PROBHD 5 mm DUL 13C-1  
 PULPROG zg30  
 TD 65536  
 SOLVENT CDCl3  
 NS 16  
 DS 2  
 SWH 6103.516 Hz  
 FIDRES 0.093132 Hz  
 AQ 5.3687091 sec  
 RG 26.3126  
 DW 81.920 usec  
 DE 6.50 usec  
 TE 295.6 K  
 D1 1.00000000 sec  
 TD0 1

==== CHANNEL f1 =====  
 SF01 300.1818537 MHz  
 NUC1 1H  
 P1 8.75 usec  
 PLW1 25.00000000 W

F2 - Processing parameters  
 SI 65536  
 SF 300.1800049 MHz  
 WDW EM  
 SSB 0  
 LB 0.30 Hz  
 GB 0  
 PC 1.00

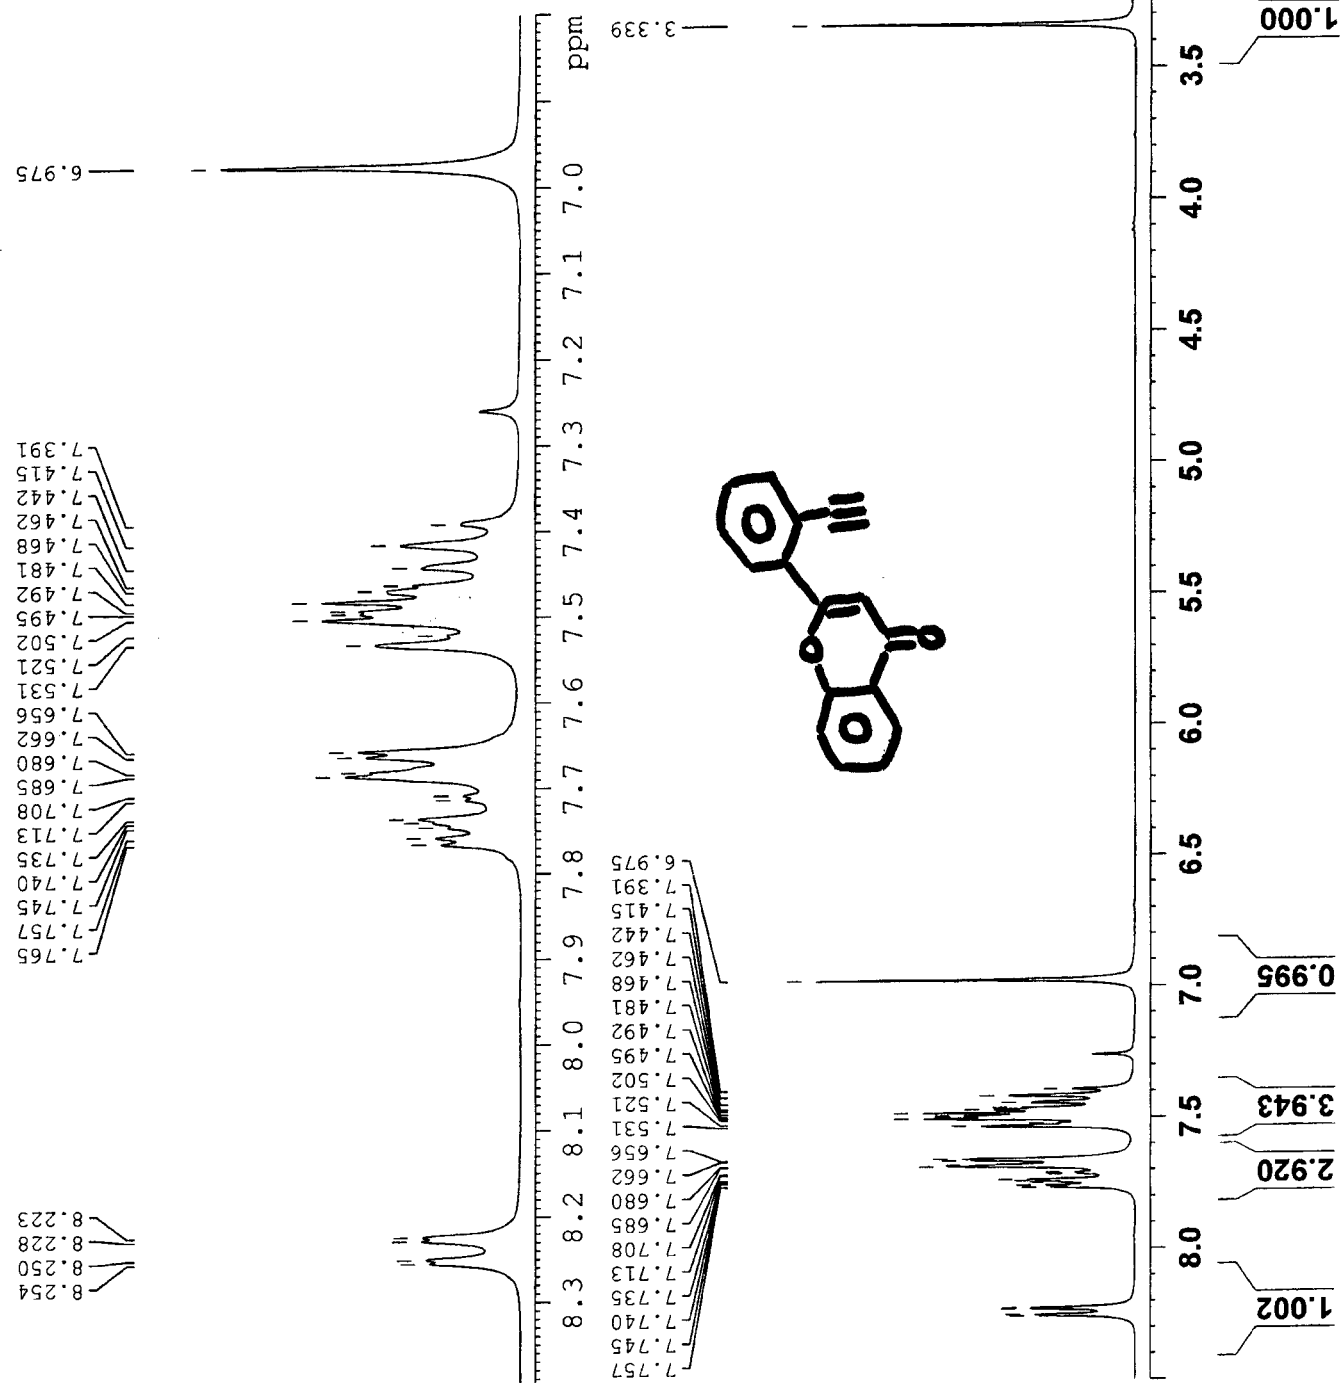

# 2'-Ethynylflavone

Current Data Parameters  
 NAME 2'-Ethynylflavone  
 EXPNO 2  
 PROCNO 1

F2 - Acquisition Parameters

Date\_ 20140502  
 Time 12.16  
 INSTRUM FOURIER300  
 PROBHD 5 mm DUL 13C-1  
 PULPROG zgpg30  
 TD 65536  
 SOLVENT CDCl3  
 NS 905  
 DS 4  
 SWH 24414.063 Hz  
 FIDRES 0.372529 Hz  
 AQ 1.3421773 sec  
 RG 501.187  
 DW 20.480 usec  
 DE 6.50 usec  
 TE 295.8 K  
 D1 2.0000000 sec  
 D31 0.0300000 sec  
 D40 0.00001600 sec  
 L4 34  
 L5 49  
 P32 105.00 usec  
 TD0 1

==== CHANNEL f1 =====  
 SFO1 75.4878687 MHz  
 NUC1 13C  
 P1 16.00 usec  
 PLW1 60.0000000 W

==== CHANNEL f2 =====  
 SFO2 300.1812007 MHz  
 NUC2 1H  
 CPDPRG12 waltz16  
 PCPD2 105.00 usec  
 PLW2 10.0000000 W  
 PLW12 0.36280999 W  
 PLW13 0.40000001 W

F2 - Processing parameters  
 SI 32768  
 SF 75.4803210 MHz  
 EM  
 WDW 0  
 SSB 0  
 LB 1.00 Hz  
 GB 0  
 PC 1.40

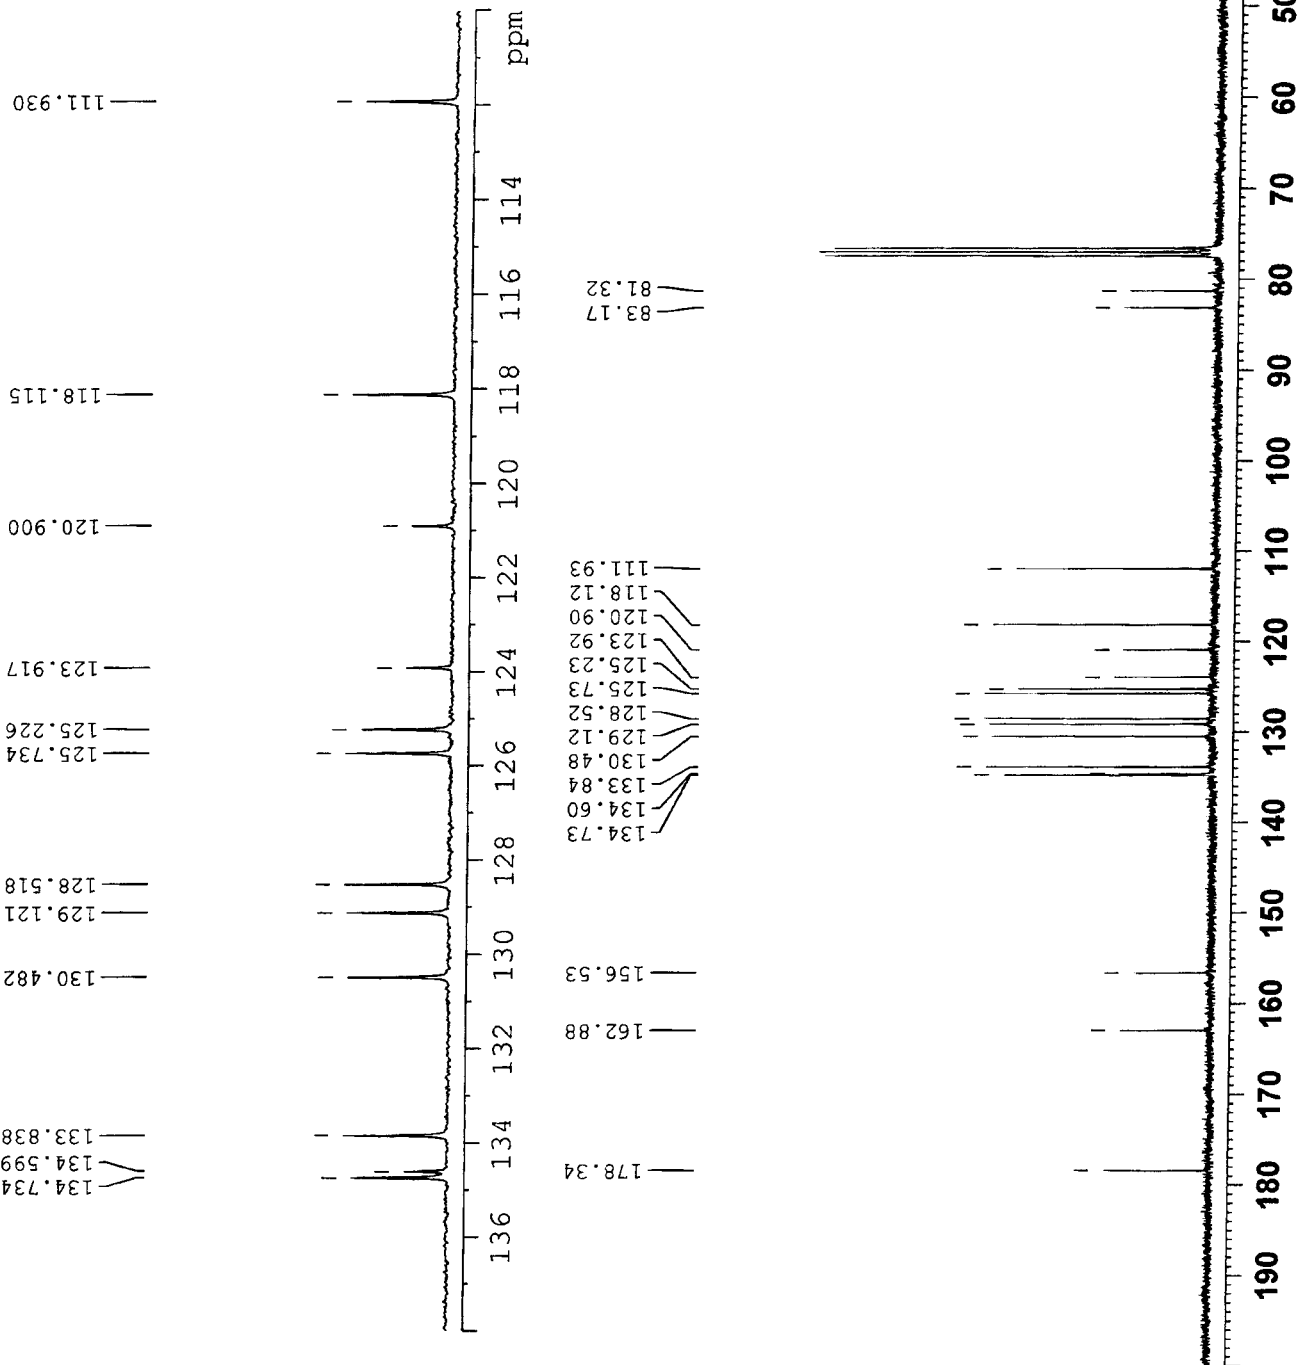

3'-Ethynyl flavone

3'-Et → F1

3.19

8.25  
8.24  
8.23  
8.22  
8.07  
8.07  
8.06  
7.91  
7.90  
7.90  
7.89  
7.88  
7.88  
7.72  
7.72  
7.70  
7.70  
7.66  
7.65  
7.65  
7.64  
7.60  
7.60  
7.58  
7.58  
7.52  
7.50  
7.48  
7.46  
7.46  
7.44  
7.44  
7.42  
7.42  
6.82

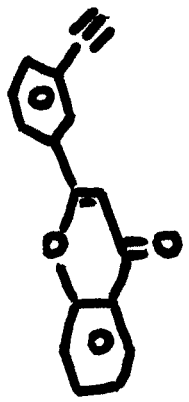

3'-Ethynyl flavone

1.00  
1.01  
1.18  
2.18  
1.06  
2.22  
0.65  
1.034  
1.55

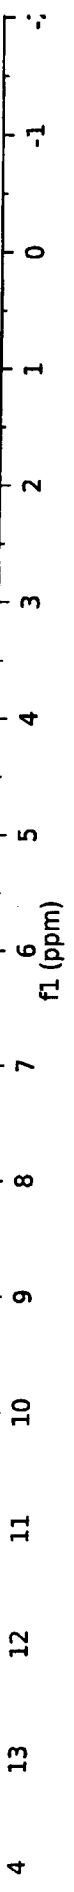

~~3'-Ethinyl flavone~~

3'-Ethinyl flavone

3'-Ethinyl flavone

- 177.35
- 162.20
- 156.76
- 132.63
- 132.48
- 131.66
- 131.29
- 129.04
- 126.20
- 124.60
- 121.00
- 118.92
- 108.41
- 83.35
- 82.21

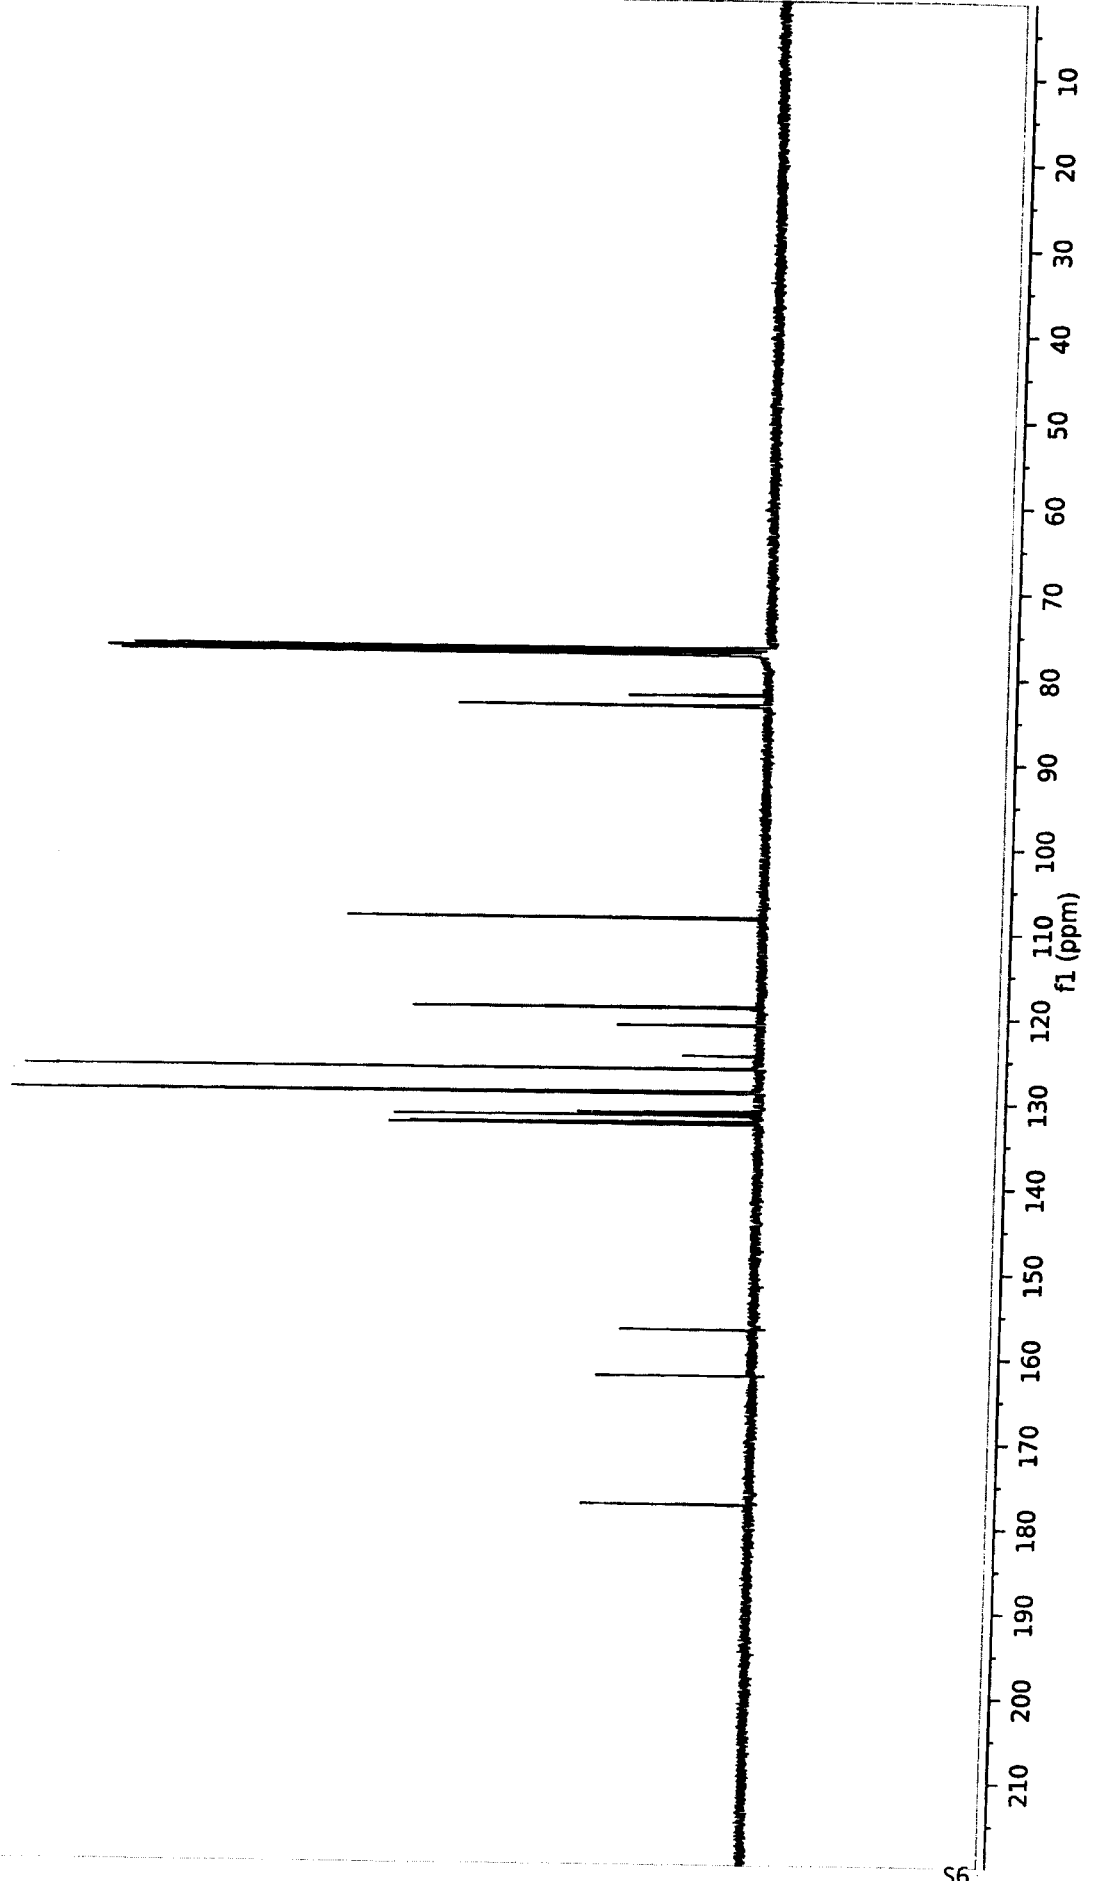

4'

4'EF

Current Data Parameters  
 NAME 4'EF  
 EXPNO 1  
 PROCNO 1

F2 - Acquisition Parameters  
 Date\_ 20120730  
 Time\_ 14.18  
 INSTRUM FOURIER300  
 PROBHD 5 mm DUL 13C-1  
 PULPROG zg30  
 TD 65536  
 SOLVENT CDC13  
 NS 16  
 DS 2  
 SWH 6103.516 Hz  
 FIDRES 0.093132 Hz  
 AQ 5.3687091 sec  
 RG 59.6078  
 DW 81.920 usec  
 DE 6.50 usec  
 TE 296.6 K  
 D1 1.0000000 sec  
 TD0 1

==== CHANNEL f1 =====  
 SF01 300.1818537 MHz  
 NUC1 1H  
 P1 8.75 usec  
 PLW1 25.0000000 W

F2 - Processing parameters  
 SI 65536  
 SF 300.1800000 MHz  
 EM  
 WDW 0  
 SSB 0  
 LB 0.30 Hz  
 GB 0  
 PC 1.00

7.418  
7.422  
7.442  
7.445  
7.448  
7.468  
7.472  
7.472  
7.569  
7.571  
7.596  
7.597  
7.599  
7.625  
7.631  
7.637  
7.653  
7.660  
7.665  
7.678  
7.699  
7.705  
7.723  
7.728  
7.733  
7.751  
7.756

7.889  
7.894  
7.901  
7.917  
7.923  
7.927

6.850  
7.418  
7.422  
7.442  
7.445  
7.448  
7.468  
7.472  
7.569  
7.571  
7.596  
7.597  
7.599  
7.625  
7.631  
7.637  
7.653  
7.660  
7.665  
7.678  
7.699  
7.705  
7.723

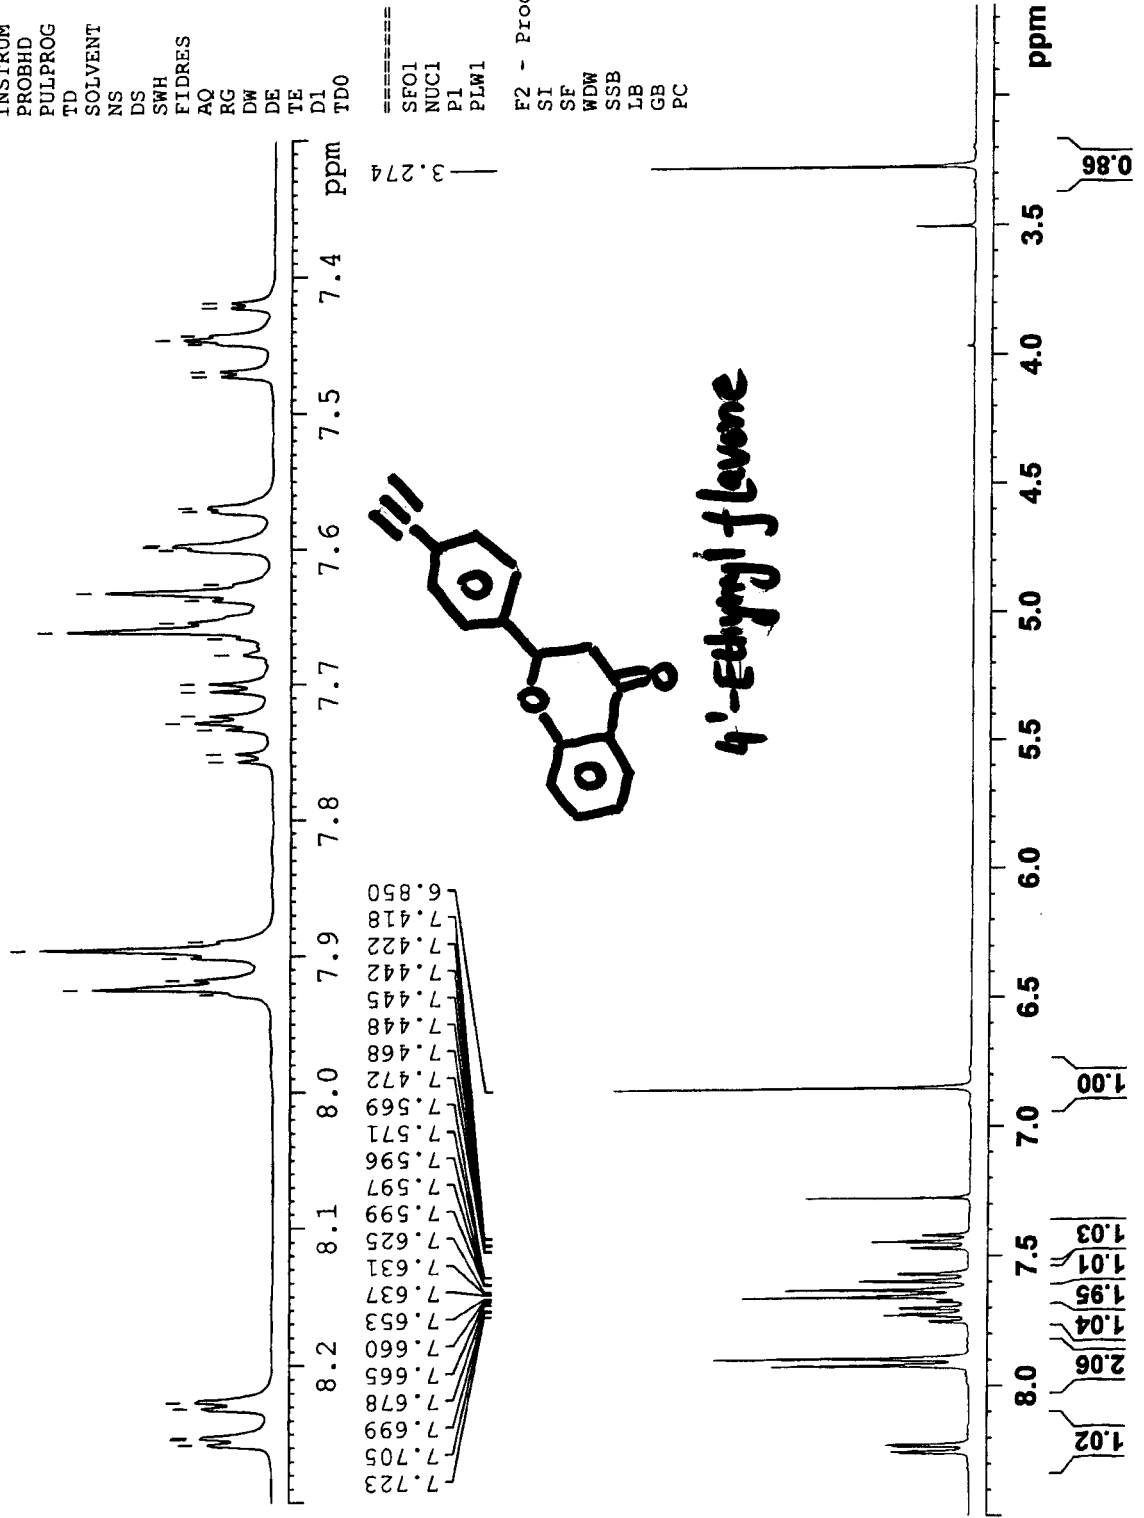

4'EF

Current Data Parameters  
 NAME 4'EF  
 EXPNO 2  
 PROCNO 1

F2 - Acquisition Parameters  
 Date\_ 20120730  
 Time\_ 14.26  
 INSTRUM FOURIER300  
 PROBHD 5 mm DUL 13C-1  
 PULPROG zgpg30  
 TD 65536  
 SOLVENT CDCl3  
 NS 1024  
 DS 4  
 SWH 24414.063 Hz  
 FIDRES 0.372529 Hz  
 AQ 1.3421773 sec  
 RG 501.187  
 DW 20.480 usec  
 DE 6.50 usec  
 TE 296.7 K  
 D1 2.0000000 sec  
 D11 0.0300000 sec  
 D31 0.0001600 sec  
 D40 0.02432300 sec  
 L4 34  
 L5 49  
 P32 105.00 usec  
 TD0 1

==== CHANNEL f1 =====  
 SFO1 75.4878687 MHz  
 NUC1 13C  
 P1 16.00 usec  
 PLW1 60.0000000 W

==== CHANNEL f2 =====  
 SFO2 300.1812007 MHz  
 NUC2 1H  
 CPDPRG[2] waltz16  
 PCPD2 105.00 usec  
 PLW2 25.0000000 W  
 PLW12 0.21336000 W  
 PLW13 0.23522000 W

F2 - Processing parameters  
 SI 32768  
 SF 75.4803210 MHz  
 EM  
 WDW 0  
 SSB 0  
 LB 1.00 Hz  
 GB 0  
 PC 1.40

178.35  
 162.45  
 156.21  
 134.00  
 133.32  
 132.72  
 131.82  
 126.16  
 125.75  
 125.43  
 123.89  
 118.10  
 107.96  
 82.72  
 80.16

4'-Ethylnyl flavone

4'-Ethylnyl flavone

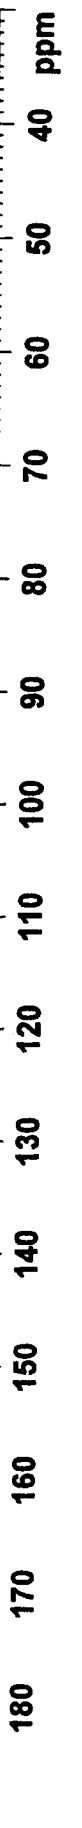



5-ethynyl flavone

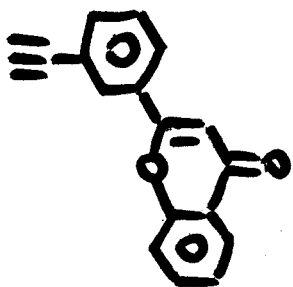

5-Ethynyl Flavone

# 5-Ethynyl Flavone

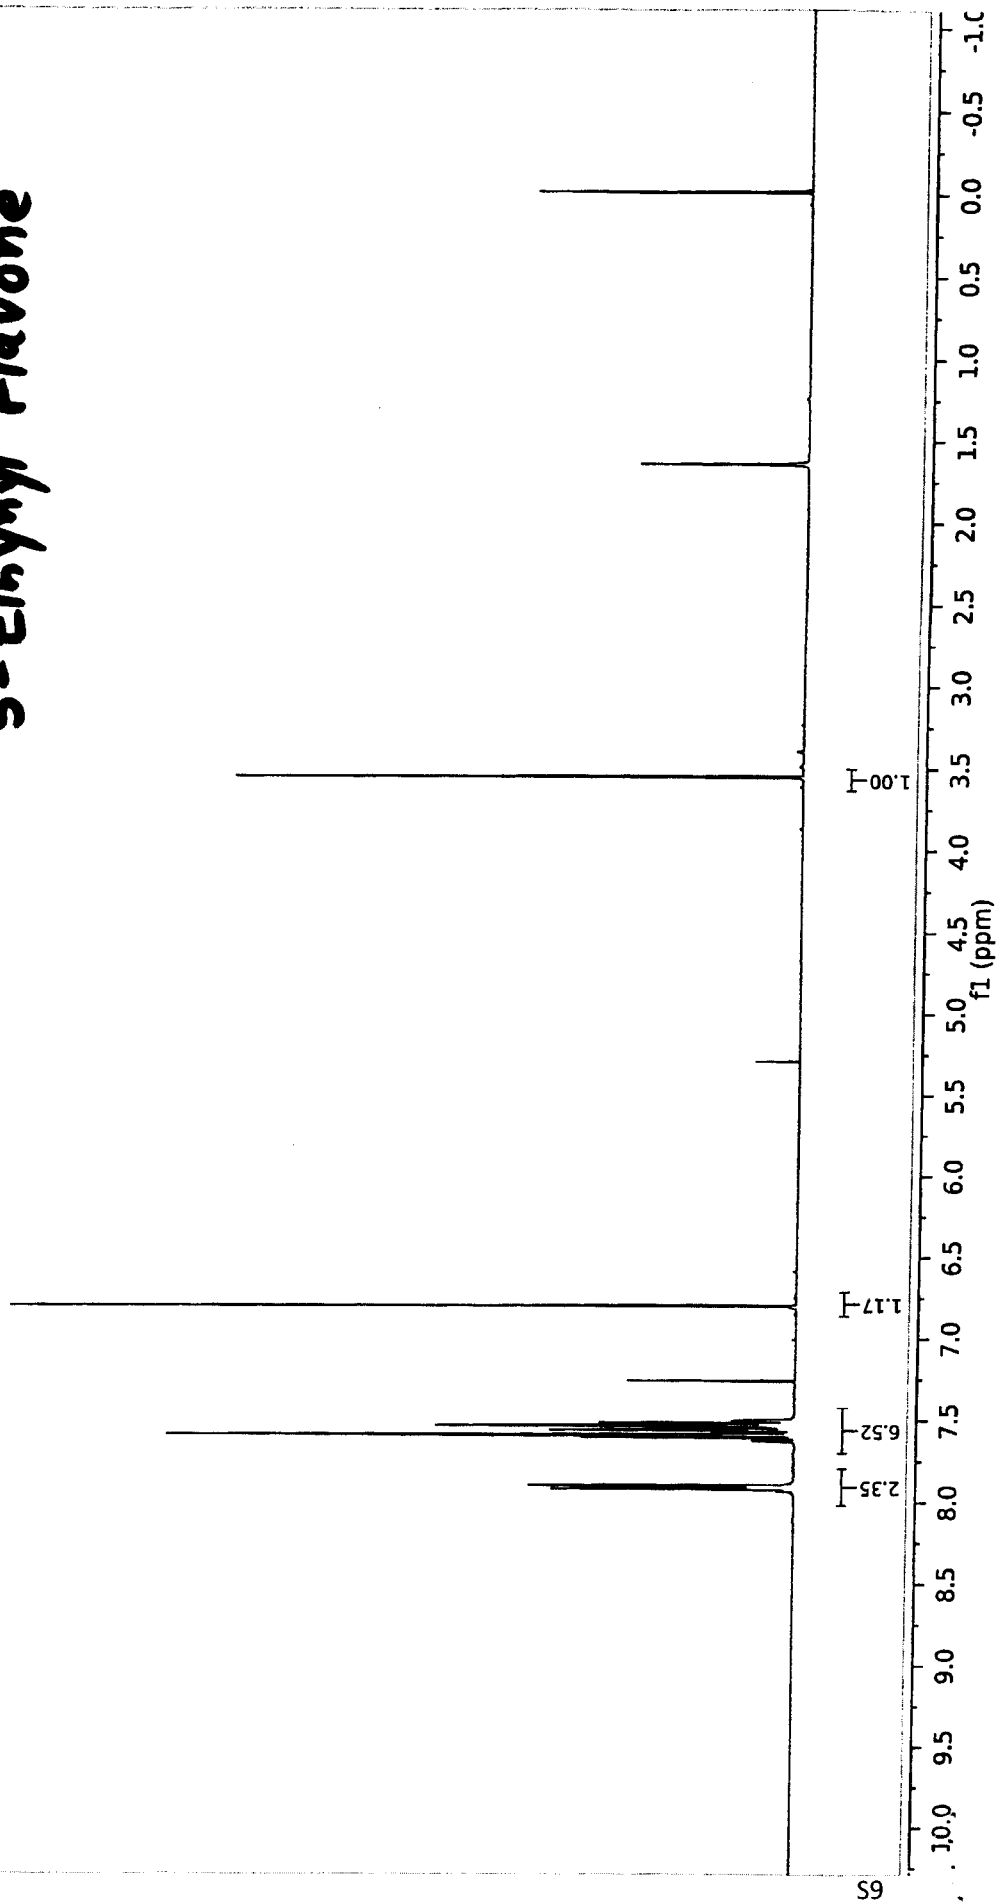

5-Ethynyl Flavone

5-Ethynyl Flavone

# 5-Ethynyl Flavone

83.31  
82.34

108.41  
118.92  
121.00  
124.60  
126.20  
129.04  
131.29  
131.66  
132.48  
132.63

156.76  
162.20

177.35

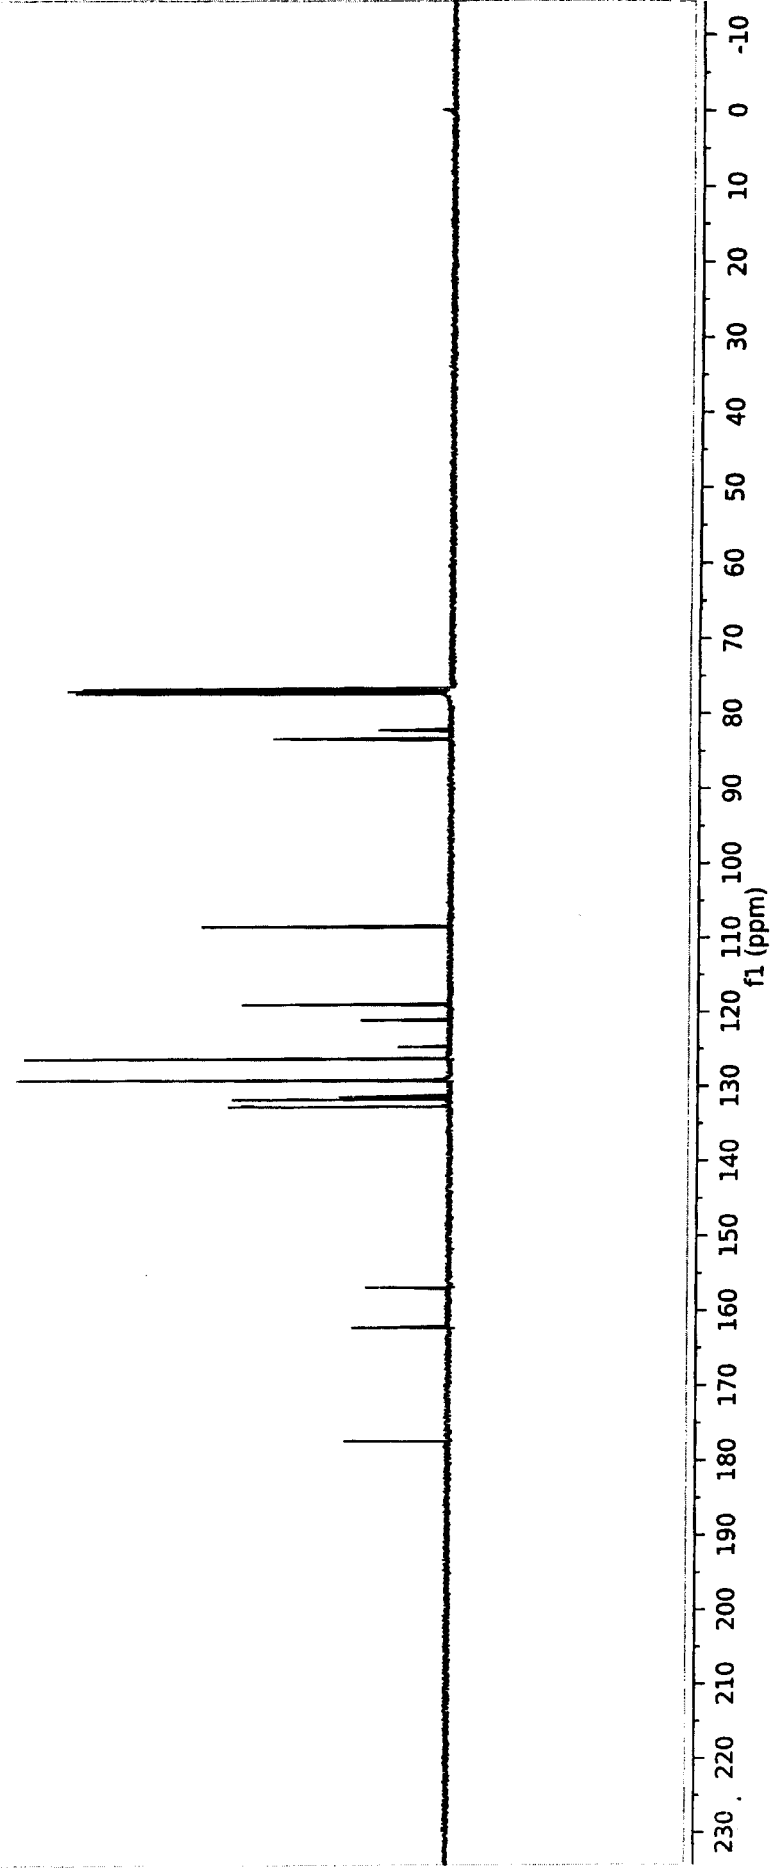

6EF

6EF

Current Data Parameters  
NAME 6-ethynylflavone  
EXPNO 1  
PROCNO 1

F2 - Acquisition Parameters  
Date\_ 20130114  
Time 14.34  
INSTRUM FOURIER300  
PROBHD 5 mm DUL 13C-1  
PULPROG zg30  
TD 65536  
SOLVENT CDCl3  
NS 16  
DS 2  
SWH 6103.516 Hz  
FIDRES 0.093132 Hz  
AQ 5.3687091 sec  
RG 51.6302  
DW 81.920 usec  
DE 6.50 usec  
TE 296.5 K  
D1 1.00000000 sec  
TD0 1

==== CHANNEL f1 =====  
SFO1 300.1818537 MHz  
NUC1 1H  
P1 8.75 usec  
PLW1 25.00000000 W

F2 - Processing parameters  
SI 65536  
SF 300.1800049 MHz  
WDW EM  
SSB 0  
LB 0.30 Hz  
GB 0  
PC 1.00

8.358  
8.352  
7.930  
7.924  
7.917  
7.906  
7.897  
7.887  
7.877  
7.871  
7.781  
7.758  
7.752  
7.556  
7.547  
7.542  
7.533  
7.522  
7.513  
6.827

3.144

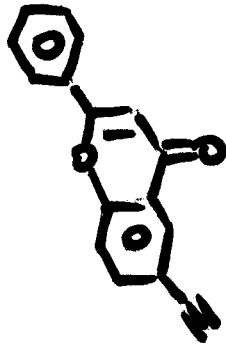

6-Ethynyl  
Flavone

6-Ethynylflavone

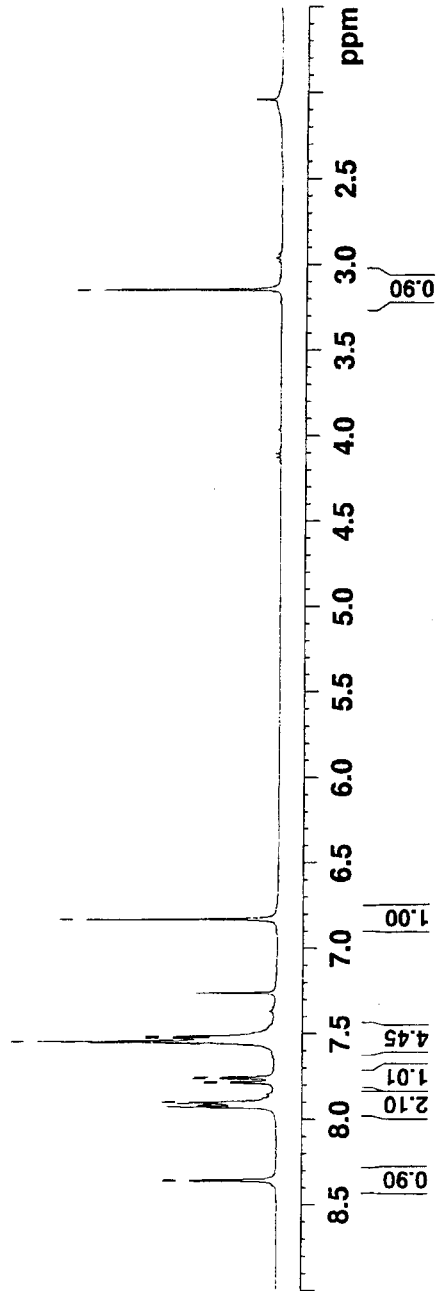

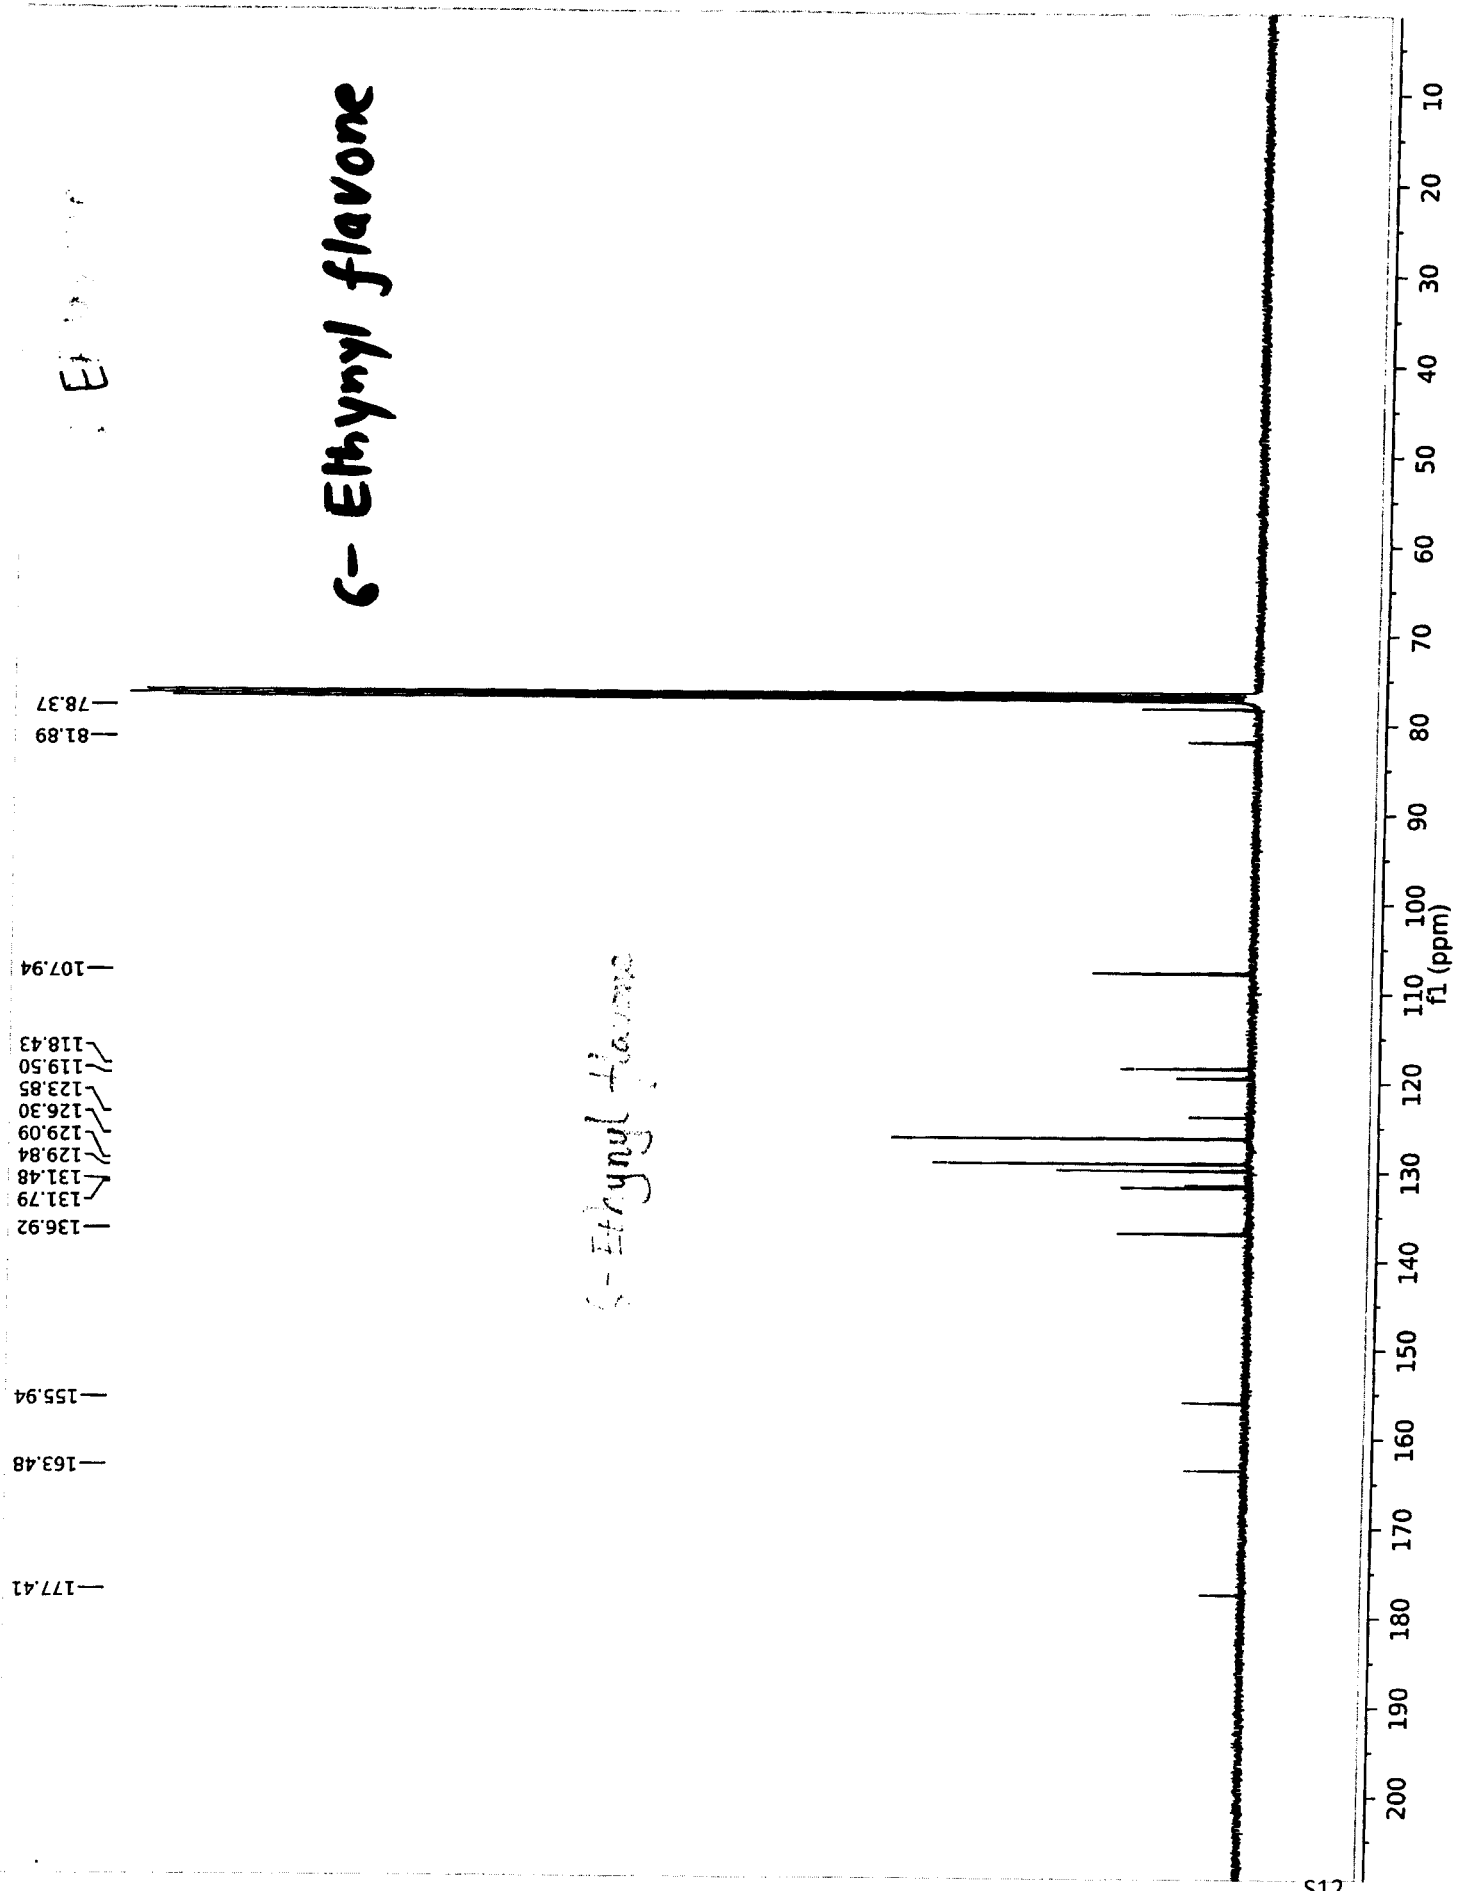

7-Ethynylflavone

Current Data Parameters  
 NAME 7-ethynylflavone  
 EXPNO 1  
 PROCNO 1

F2 - Acquisition Parameters  
 Date\_ 20121003  
 Time 15.35  
 INSTRUM FOURIER300  
 PROBDH 5 mm DUL 13C-1  
 PULPROG zg30  
 TD 65536  
 SOLVENT CDCl3  
 NS 16  
 DS 2  
 SWH 6103.516 Hz  
 FIDRES 0.093132 Hz  
 AQ 5.3687091 sec  
 RG 45.8507  
 DW 81.920 usec  
 DE 6.50 usec  
 TE 297.5 K  
 D1 1.0000000 sec  
 TD0 1

==== CHANNEL f1 =====  
 SFO1 300.1818537 MHz  
 NUC1 1H  
 P1 8.75 usec  
 PLW1 25.0000000 W

F2 - Processing parameters  
 SI 65536  
 SF 300.1800050 MHz  
 WDW EM  
 SSB 0  
 LB 0  
 GB 0  
 PC 1.00

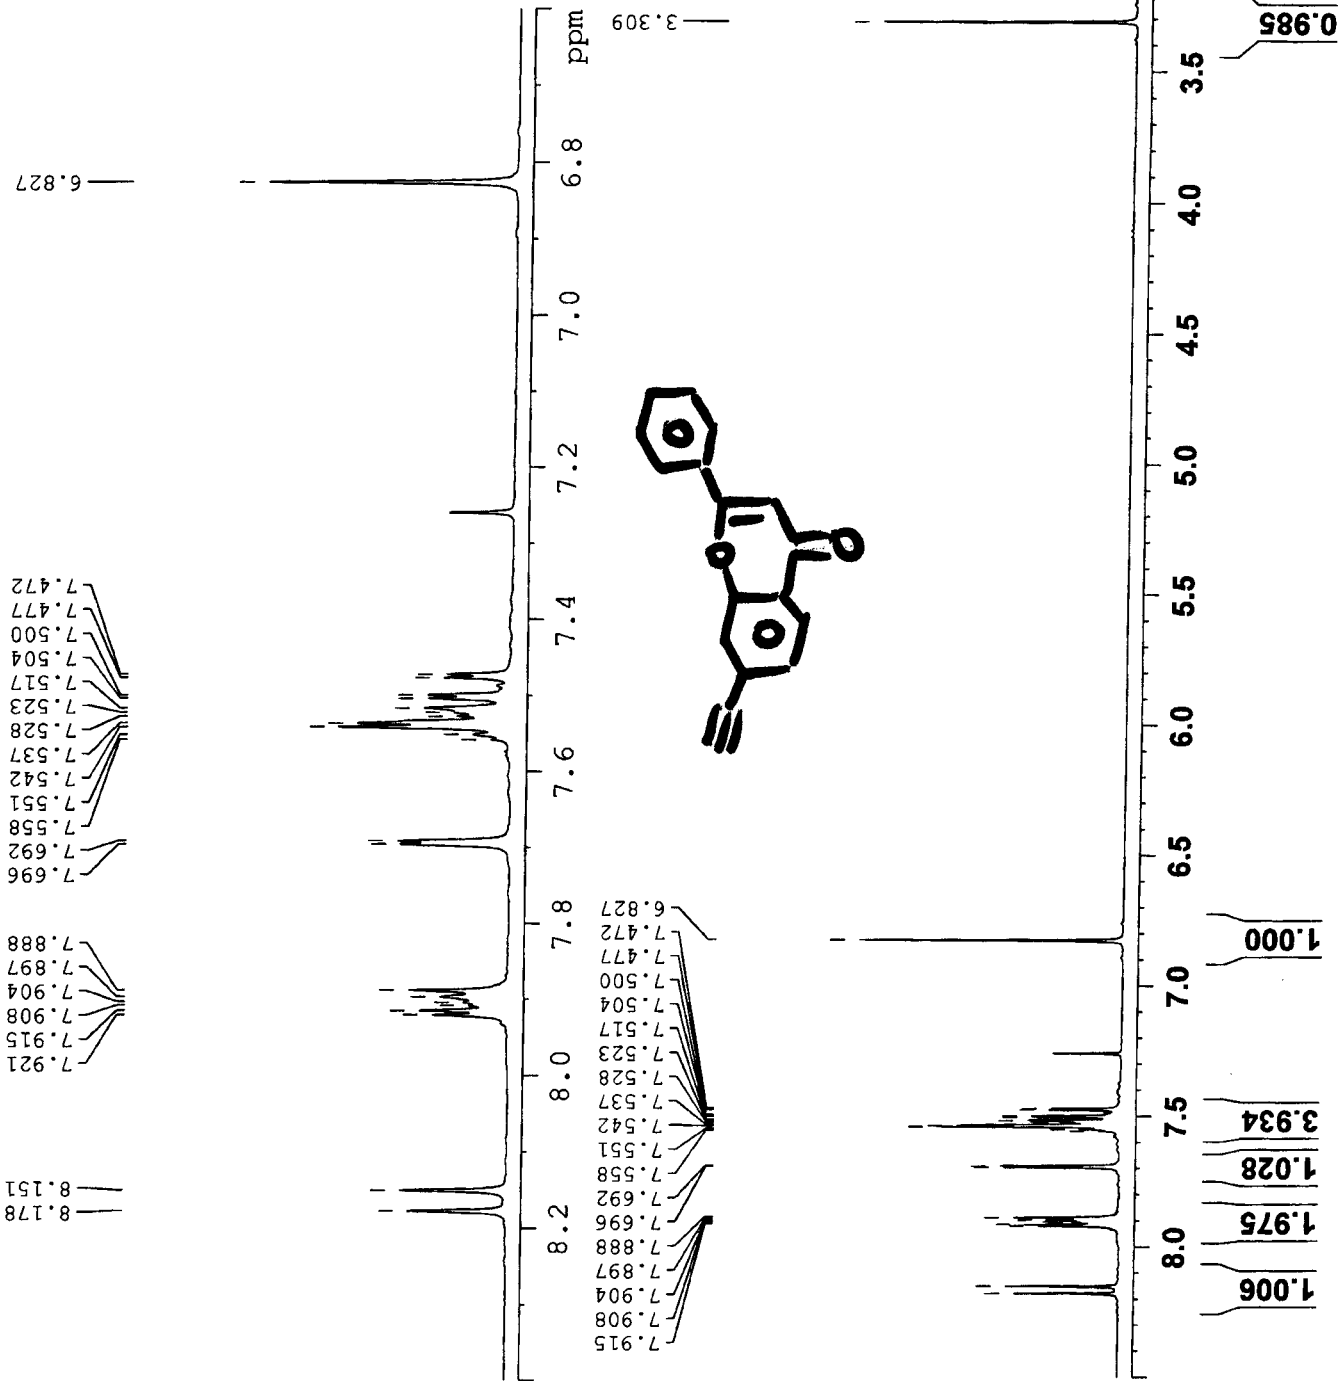

7-Ethynylflavone

Current Data Parameters  
 NAME 7-ethynylflavone  
 EXPNO 2  
 PROCNO 1

F2 - Acquisition Parameters

Date\_ 20121003  
 Time\_ 15.45  
 INSTRUM FOURIER300  
 PROBHD 5 mm DUL 13C-1  
 PULPROG zgpg30  
 TD 65536  
 SOLVENT CDCl3  
 NS 909  
 DS 4  
 SWH 24414.063 Hz  
 FIDRES 0.372529 Hz  
 AQ 1.3421773 sec  
 RG 501.187  
 DW 20.480 usec  
 DE 6.50 usec  
 TE 297.6 K  
 D1 2.0000000 sec  
 D11 0.0300000 sec  
 D31 0.0001600 sec  
 D40 0.02432300 sec  
 L4 34  
 L5 49  
 P32 105.00 usec  
 TD0 1

==== CHANNEL f1 =====  
 SFO1 75.4878687 MHz  
 NUC1 13C  
 P1 16.00 usec  
 PLW1 60.0000000 W

==== CHANNEL f2 =====  
 SFO2 300.1812007 MHz  
 NUC2 1H  
 CPDPRG12 waltz16  
 PCPD2 105.00 usec  
 PLW2 25.0000000 W  
 PLW12 0.21336000 W  
 PLW13 0.23522000 W

F2 - Processing parameters

SI 32768  
 SF 75.4803210 MHz  
 EM  
 WDW 0  
 SSB 0  
 LB 1.00 Hz  
 GB 0  
 PC 1.40

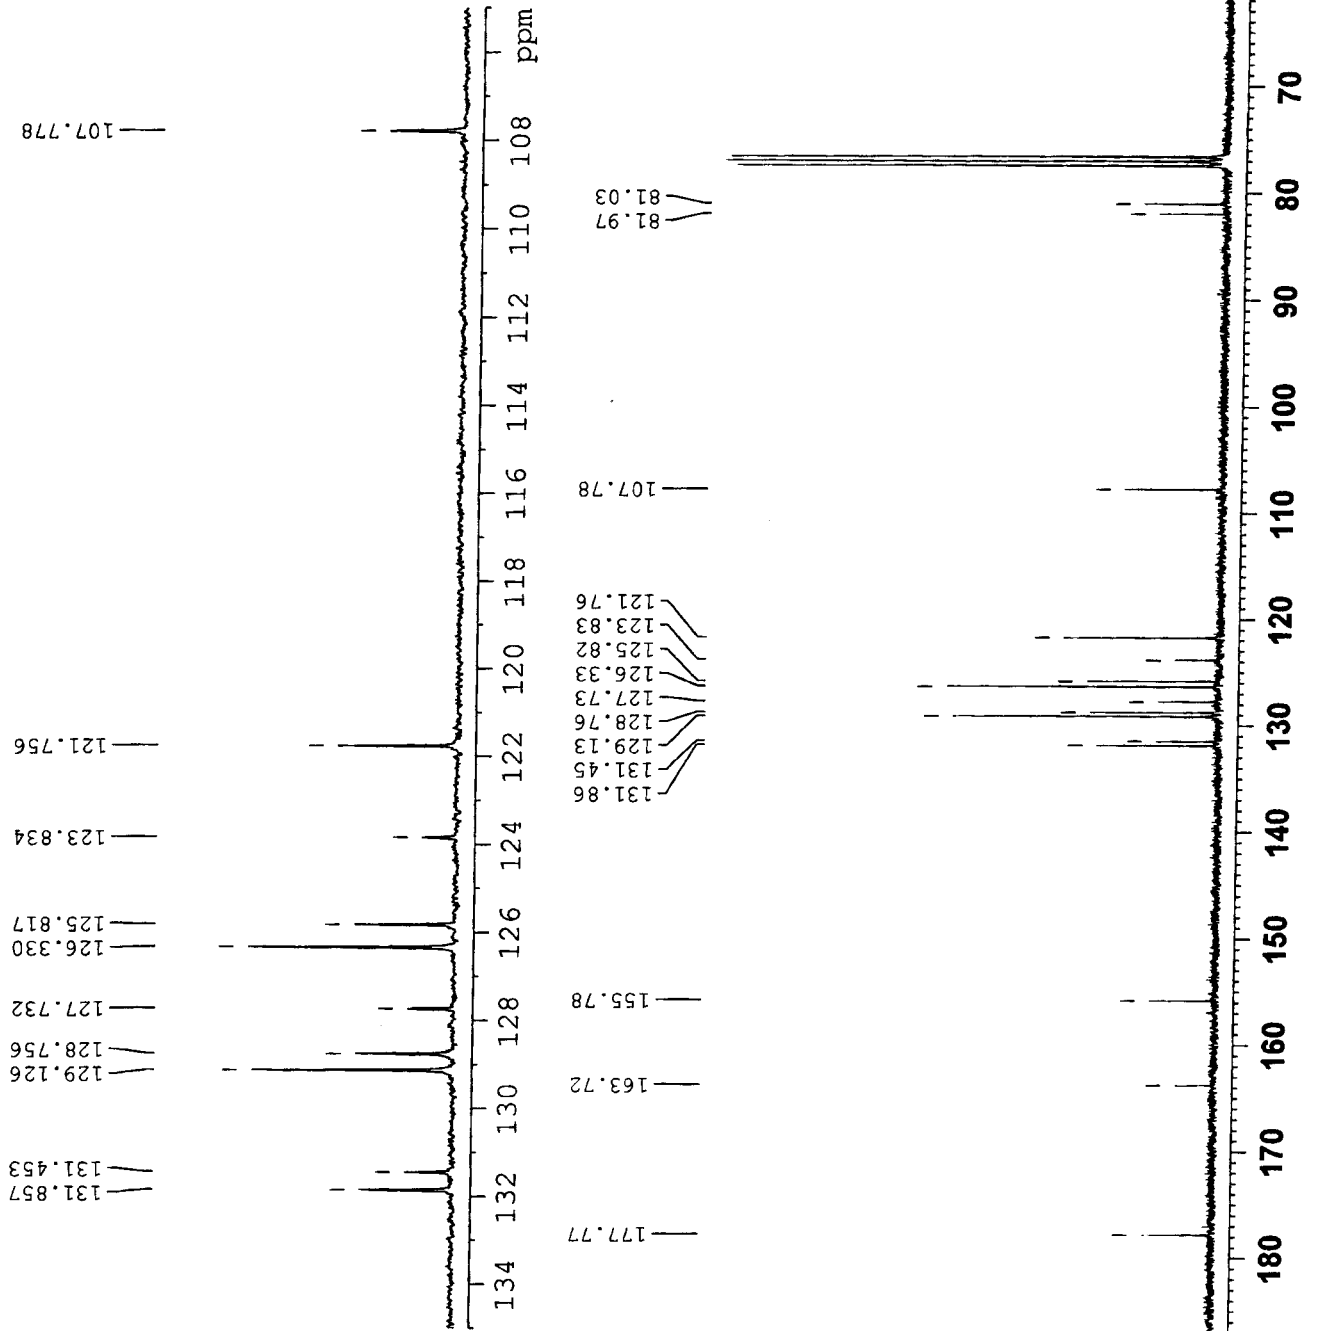

## Atlantic Microlab, Inc.

Sample No. 2'EF

6180 Atlantic Blvd. Suite M  
Norcross, GA 30071  
www.atlanticmicrolab.com

Company/School Xavier University of Louisiana

Dept. Chemistry

Address 1 Drexel Dr

City, State, Zip New Orleans, LA 70125

Professor/Supervisor: Dr Maryam Foroozesh

Name Jlawang Liu Date 10/22/2013

PO# / CC# P0046569

Phone (504) 638-4036

| Element | Theory | Found |       | Single <input type="checkbox"/>                                                                                                                                                       | Duplicate <input checked="" type="checkbox"/> |
|---------|--------|-------|-------|---------------------------------------------------------------------------------------------------------------------------------------------------------------------------------------|-----------------------------------------------|
| C       | 82.91  | 81.67 | 81.68 | Elements Present: C, H, O                                                                                                                                                             |                                               |
| H       | 4.09   | 4.21  | 4.35  | Analyze for: C, H                                                                                                                                                                     |                                               |
|         |        |       |       | Hygroscopic <input type="checkbox"/> Explosive <input type="checkbox"/>                                                                                                               |                                               |
|         |        |       |       | M.P. _____ B.P. _____                                                                                                                                                                 |                                               |
|         |        |       |       | To be dried: Yes <input type="checkbox"/> No <input checked="" type="checkbox"/>                                                                                                      |                                               |
|         |        |       |       | Temp. _____ /vac. _____ Time _____                                                                                                                                                    |                                               |
|         |        |       |       | Rush Service <input type="checkbox"/> <small>Rush service guarantees analyses will be completed and results available by 5 PM EST on the day the sample is received by 11 AM.</small> |                                               |
|         |        |       |       | Include Email Address or FAX # Below                                                                                                                                                  |                                               |
|         |        |       |       | mforooze@xula.edu                                                                                                                                                                     |                                               |

Date Received OCT 29 2013

Date Completed OCT 30 2013

Remarks:

# Atlantic Microlab, Inc.

Sample No. 3'EF  
**6180 Atlantic Blvd. Suite M**  
**Norcross, GA 30071**  
**www.atlanticmicrolab.com**

Company/School Xavier University of Louisiana  
 Dept. Chemistry  
 Address 1 Drexel Dr  
 City, State, Zip New Orleans, LA 70125  
 Name Jiawang Liu Date 10/22/2013  
 Phone (504) 638-4036

Professor/Supervisor: Dr Maryam Foroozesh  
 PO# / CC# PD046569

| Element | Theory | Found |       | Single <input type="checkbox"/>                                                                                                                                                       | Duplicate <input checked="" type="checkbox"/> |
|---------|--------|-------|-------|---------------------------------------------------------------------------------------------------------------------------------------------------------------------------------------|-----------------------------------------------|
| C       | 82.91  | 81.33 | 81.44 | Elements Present: <u>C, H, O</u>                                                                                                                                                      |                                               |
| H       | 4.09   | 4.09  | 4.20  | Analyze for: <u>C, H</u>                                                                                                                                                              |                                               |
|         |        |       |       | Hygroscopic <input type="checkbox"/> Explosive <input type="checkbox"/>                                                                                                               |                                               |
|         |        |       |       | M.P. _____ B.P. _____                                                                                                                                                                 |                                               |
|         |        |       |       | To be dried: Yes <input type="checkbox"/> No <input checked="" type="checkbox"/>                                                                                                      |                                               |
|         |        |       |       | Temp. _____ Vac. _____ Time _____                                                                                                                                                     |                                               |
|         |        |       |       | Rush Service <input type="checkbox"/> <small>Rush service guarantees analyses will be completed and results available by 5 PM EST on the day the sample is received by 11 AM.</small> |                                               |
|         |        |       |       | Include Email Address or FAX # Below<br>mforooze@xula.edu                                                                                                                             |                                               |

Date Received OCT 29 2013 Date Completed OCT 30 2013  
 Remarks: \_\_\_\_\_



# Atlantic Microlab, Inc.

Sample No. 4'EF

6180 Atlantic Blvd. Suite M  
Norcross, GA 30071  
www.atlanticmicrolab.com

Company/School Xavier University of Louisiana  
Dept. Chemistry  
Address 1 Drexel Dr  
City, State, Zip New Orleans, LA 70125

Professor/Supervisor: Dr Maryam Foroozesh  
PO# / CC# P0046569

Name Jiawang Liu Date 10/22/2013  
Phone (504) 638-4036

| Element | Theory | Found |       | Single <input type="checkbox"/>                                                                                                                                                       | Duplicate <input checked="" type="checkbox"/> |
|---------|--------|-------|-------|---------------------------------------------------------------------------------------------------------------------------------------------------------------------------------------|-----------------------------------------------|
| C       | 82.91  | 82.50 | 82.36 | Elements Present: C, H, O                                                                                                                                                             |                                               |
| H       | 4.09   | 4.26  | 4.39  | Analyze for: C, H                                                                                                                                                                     |                                               |
|         |        |       |       | Hygroscopic <input type="checkbox"/> Explosive <input type="checkbox"/>                                                                                                               |                                               |
|         |        |       |       | M.P. _____ B.P. _____                                                                                                                                                                 |                                               |
|         |        |       |       | To be dried: Yes <input type="checkbox"/> No <input checked="" type="checkbox"/>                                                                                                      |                                               |
|         |        |       |       | Temp. _____ Vac. _____ Time _____                                                                                                                                                     |                                               |
|         |        |       |       | Rush Service <input type="checkbox"/> <small>Rush service guarantees analyses will be completed and results available by 5 PM EST on the day the sample is received by 11 AM.</small> |                                               |
|         |        |       |       | Include Email Address or FAX # Below                                                                                                                                                  |                                               |
|         |        |       |       | mforooze@xula.edu                                                                                                                                                                     |                                               |

Date Received OCT 29 2013 Date Completed OCT 30 2013  
Remarks: \_\_\_\_\_

# Atlantic Microlab, Inc.

Sample No. SEF  
 6180 Atlantic Blvd. Suite M  
 Norcross, GA 30071  
 www.atlanticmicrolab.com

Company/School Xavier University of Louisiana  
 Dept. Chemistry  
 Address 1 Drexel Dr  
 City, State, Zip New Orleans, LA 70125  
 Name Jiawang Liu Date 10/22/2013  
 Phone (504) 638-4036

Professor/Supervisor: Dr Maryam Foroozesh  
 PO# / CC# P0046569

| Element | Theory | Found |       | Single <input type="checkbox"/> Duplicate <input checked="" type="checkbox"/><br>Elements Present: <u>C, H, O</u><br>Analyze for: <u>C, H</u><br>Hygroscopic <input type="checkbox"/> Explosive <input type="checkbox"/><br>M.P. _____ B.P. _____<br>To be dried: Yes <input type="checkbox"/> No <input checked="" type="checkbox"/><br>Temp. _____ Vac. _____ Time _____<br>Rush Service <input type="checkbox"/> <small>Rush service guarantees analyses will be completed and results available by 5 PM EST on the day the sample is received by 11 AM.</small><br>Include Email Address or FAX # Below<br><u>mforooze@xula.edu</u> |
|---------|--------|-------|-------|-----------------------------------------------------------------------------------------------------------------------------------------------------------------------------------------------------------------------------------------------------------------------------------------------------------------------------------------------------------------------------------------------------------------------------------------------------------------------------------------------------------------------------------------------------------------------------------------------------------------------------------------|
| C       | 82.91  | 82.04 | 82.07 |                                                                                                                                                                                                                                                                                                                                                                                                                                                                                                                                                                                                                                         |
| H       | 4.09   | 4.20  | 4.29  |                                                                                                                                                                                                                                                                                                                                                                                                                                                                                                                                                                                                                                         |
|         |        |       |       |                                                                                                                                                                                                                                                                                                                                                                                                                                                                                                                                                                                                                                         |
|         |        |       |       |                                                                                                                                                                                                                                                                                                                                                                                                                                                                                                                                                                                                                                         |
|         |        |       |       |                                                                                                                                                                                                                                                                                                                                                                                                                                                                                                                                                                                                                                         |

Date Received OCT 29 2013 Date Completed OCT 30 2013  
 Remarks: \_\_\_\_\_

## Atlantic Microlab, Inc.

Sample No. 0 EF  
 6180 Atlantic Blvd. Suite M  
 Norcross, GA 30071  
 www.atlantcmicrolab.com  
 Company/School Xavier University of Louisiana  
 Dept. Chemistry  
 Address 1 Drexel Dr  
 City, State, Zip New Orleans, LA 70125  
 Professor/Supervisor: Dr Maryam Foroozesh Name Jiawang Liu Date 07/26/2013  
 PO# / CC# P0042436 Phone (504) 638-4036

| Element | Theory | Found |       | Single <input type="checkbox"/> Duplicate <input checked="" type="checkbox"/>                                                                                                         |  |
|---------|--------|-------|-------|---------------------------------------------------------------------------------------------------------------------------------------------------------------------------------------|--|
|         |        |       |       | Elements Present: C, H, O                                                                                                                                                             |  |
| C       | 82.91  | 80.86 | 80.62 | Analyze for: C, H                                                                                                                                                                     |  |
| H       | 4.09   | 4.53  | 4.41  | Hygroscopic <input type="checkbox"/> Explosive <input type="checkbox"/>                                                                                                               |  |
|         |        |       |       | M.P. _____ B.P. _____                                                                                                                                                                 |  |
|         |        |       |       | To be dried: Yes <input type="checkbox"/> No <input checked="" type="checkbox"/>                                                                                                      |  |
|         |        |       |       | Temp. _____ Vac. _____ Time _____                                                                                                                                                     |  |
|         |        |       |       | Rush Service <input type="checkbox"/> <small>Rush service guarantees analyses will be completed and results available by 5 PM EST on the day the sample is received by 11 AM.</small> |  |
|         |        |       |       | Include Email Address or FAX # Below<br>mforooze@xula.edu                                                                                                                             |  |

Date Received AUG 05 2013 Date Completed AUG 06 2013  
 Remarks: \_\_\_\_\_

# Atlantic Microlab, Inc.

Sample No. 7EF  
 6180 Atlantic Blvd. Suite M  
 Norcross, GA 30071  
 www.atlanticmicrolab.com

Company/School Xavier University of Louisiana  
 Dept. Chemistry  
 Address 1 Drexel Dr  
 City, State, Zip New Orleans, LA 70125  
 Name Jiawang Liu Date \_\_\_\_\_  
 Phone (504) 638-4036

Professor/Supervisor: Dr Maryam Foroozesh  
 PO# / CC# P0037218

| Element | Theory | Found |       | Single <input type="checkbox"/> Duplicate <input checked="" type="checkbox"/>                                                                                                         |              |
|---------|--------|-------|-------|---------------------------------------------------------------------------------------------------------------------------------------------------------------------------------------|--------------|
|         |        |       |       | Elements Present:                                                                                                                                                                     | Analyze for: |
| C       | 82.91  | 81.91 | 81.83 | C, H, O                                                                                                                                                                               |              |
| H       | 4.09   | 4.22  | 4.10  | C, H                                                                                                                                                                                  |              |
|         |        |       |       | Hygroscopic <input type="checkbox"/> Explosive <input type="checkbox"/>                                                                                                               |              |
|         |        |       |       | M.P. <u>144°C</u> B.P. _____                                                                                                                                                          |              |
|         |        |       |       | To be dried: Yes <input type="checkbox"/> No <input checked="" type="checkbox"/>                                                                                                      |              |
|         |        |       |       | Temp. _____ Vac. _____ Time _____                                                                                                                                                     |              |
|         |        |       |       | Rush Service <input type="checkbox"/> <small>Rush service guarantees analysis will be completed and results available by 8 PM EST on the day the sample is received by 11 AM.</small> |              |
|         |        |       |       | Include Email Address or FAX # Below                                                                                                                                                  |              |
|         |        |       |       | mforooze@xula.edu                                                                                                                                                                     |              |

Date Received OCT 18 2012 Date Completed OCT 19 2012  
 Remarks: \_\_\_\_\_
